# Supplementary material
Source: PubMed Central journal article supplement (PMC7299683)
Supplement: 10-1055-s-0040-1713412-s190254ra.pdf [file 10-1055-s-0040-1713412-s190254ra.pdf]

**Table S1** The proportions of function accesses by user role

| MHAV and EHR      |             |            |            |           |
|-------------------|-------------|------------|------------|-----------|
|                   | Appointment | Laboratory | Medication | Messaging |
| Technician        | 11.7%       | 16.5%      | 2.9%       | 68.9%     |
| Staff             | 7.5%        | 10.1%      | 2.0%       | 80.5%     |
| Student           | 6.5%        | 15.2%      | 3.5%       | 74.8%     |
| Nurse             | 9.2%        | 17.1%      | 2.5%       | 71.3%     |
| Physician         | 5.7%        | 9.8%       | 1.7%       | 82.8%     |
| Medical assistant | 7.6%        | 14.1%      | 2.3%       | 76.1%     |
| Research          | 9.2%        | 15.0%      | 2.6%       | 73.3%     |
| Administrators    | 9.1%        | 12.4%      | 1.8%       | 76.8%     |
| Other             | 8.9%        | 14.7%      | 2.8%       | 73.7%     |
| Overall           | 8.7%        | 14.9%      | 2.5%       | 73.9%     |
| MHAV only         |             |            |            |           |
|                   | Appointment | Laboratory | Medication | Messaging |
| Technician        | 11.1%       | 17.9%      | 3.8%       | 67.2%     |
| Staff             | 10.7%       | 17.1%      | 5.6%       | 66.6%     |
| Student           | 9.5%        | 22.3%      | 4.5%       | 63.8%     |
| Nurse             | 10.3%       | 25.3%      | 3.3%       | 61.1%     |
| Physician         | 8.3%        | 19.5%      | 3.2%       | 69.0%     |
| Assistant         | 8.8%        | 25.6%      | 3.2%       | 62.5%     |
| Research          | 9.8%        | 25.6%      | 4.4%       | 60.1%     |
| Administrators    | 9.5%        | 15.2%      | 3.4%       | 71.9%     |
| Other             | 11.0%       | 22.3%      | 3.8%       | 62.9%     |
| Overall           | 10.8%       | 22.4%      | 3.8%       | 63.0%     |

Abbreviations: EHR, electronic health record; GLM, generalized linear model; MHAV, My Health at Vanderbilt.

Note: The GLM analysis indicated a significant difference in proportions of employees by role, as well as the number of accesses in both employee groups.

**Table S2** The proportions of logins per access type, by user role, for functions only available in the EHR

| MHAV and EHR      | Documents | Messages | Laboratories | Medications | Images | Orders | Encounters | Other |
|-------------------|-----------|----------|--------------|-------------|--------|--------|------------|-------|
| Technician        | 45.0%     | 7.6%     | 6.9%         | 2.7%        | 1.4%   | 30.3%  | 1.7%       | 4.5%  |
| Staff             | 62.1%     | 14.1%    | 8.3%         | 3.1%        | 1.1%   | 1.2%   | 1.6%       | 8.6%  |
| Student           | 53.9%     | 6.3%     | 19.5%        | 3.5%        | 1.2%   | 10.2%  | 1.8%       | 3.5%  |
| Nurse             | 46.0%     | 8.4%     | 10.7%        | 2.8%        | 1.3%   | 25.3%  | 1.5%       | 4.1%  |
| Physician         | 60.6%     | 9.5%     | 18.1%        | 3.0%        | 1.6%   | 0.4%   | 2.0%       | 4.9%  |
| Medical assistant | 43.2%     | 8.1%     | 7.5%         | 2.2%        | 0.9%   | 32.4%  | 1.2%       | 4.6%  |
| Research          | 60.5%     | 9.5%     | 11.9%        | 3.4%        | 1.2%   | 6.0%   | 2.1%       | 5.5%  |
| Administrator     | 49.1%     | 8.2%     | 6.2%         | 2.7%        | 1.4%   | 26.2%  | 1.5%       | 4.8%  |
| Other             | 60.3%     | 11.1%    | 11.2%        | 3.6%        | 1.4%   | 4.1%   | 2.08%      | 6.3%  |
| Overall           | 53.5%     | 9.7%     | 10.9%        | 3.1%        | 1.3%   | 14.4%  | 1.8%       | 5.3%  |
| EHR only          | Documents | Messages | Laboratories | Medications | Images | Orders | Encounters | Other |
| Technician        | 46.3%     | 5.1%     | 8.1%         | 3.2%        | 1.8%   | 29.8%  | 2.0%       | 3.8%  |
| Staff             | 56.5%     | 11.8%    | 8.6%         | 4.1%        | 1.2%   | 9.4%   | 4.4%       | 4.0%  |
| Student           | 42.5%     | 2.6%     | 18.2%        | 5.5%        | 1.0%   | 26.4%  | 0.8%       | 3.1%  |
| Nurse             | 59.7%     | 8.2%     | 14.3%        | 3.6%        | 1.8%   | 4.7%   | 3.6%       | 4.2%  |
| Physician         | 61.9%     | 8.2%     | 17.9%        | 4.1%        | 1.2%   | 0.8%   | 3.2%       | 2.8%  |
| Medical assistant | 42.2%     | 7.6%     | 7.8%         | 1.7%        | 0.7%   | 34.1%  | 3.5%       | 2.3%  |
| Research          | 47.5%     | 5.0%     | 11.0%        | 2.8%        | 0.7%   | 28.0%  | 2.1%       | 3.0%  |
| Administrator     | 48.1%     | 6.1%     | 7.7%         | 4.4%        | 1.4%   | 29.5%  | 0.4%       | 2.4%  |
| Other             | 61.4%     | 8.7%     | 11.7%        | 4.1%        | 1.7%   | 3.9%   | 3.8%       | 4.6%  |
| Overall           | 57.8%     | 8.4%     | 12.3%        | 3.8%        | 1.5%   | 8.7%   | 3.5%       | 4.0%  |

Abbreviations: EHR, electronic health record; GLM, generalized linear model; MHAV, My Health at Vanderbilt.

Note: The GLM analysis indicated a significant difference in proportions of employees by role, as well as the number of accesses in both employee groups.
